# Supplementary material
Source: PubMed Central journal article supplement (PMC1955702)
Supplement: plntcell_tpc.107.050674_2.pdf [file plntcell_tpc.107.050674_2.pdf]

## Supplemental Figure 2

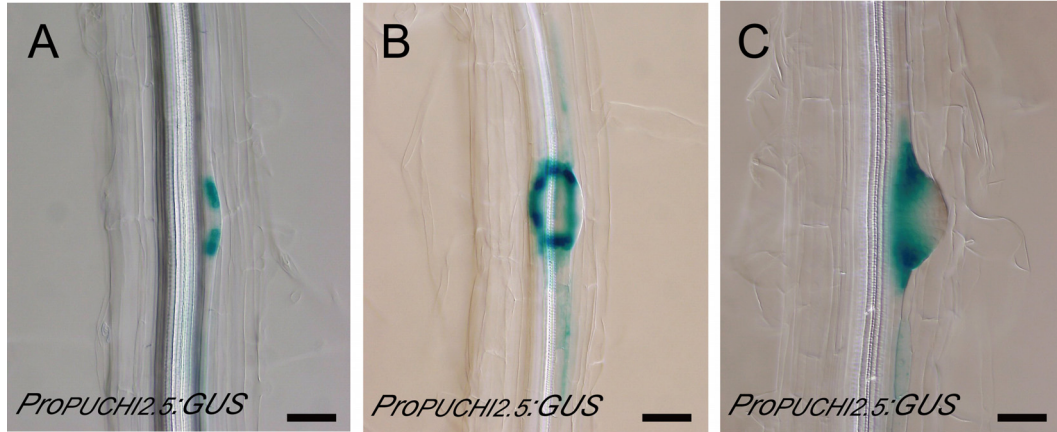

### Supplemental Figure 2. The Expression of *ProPUCHI2.5:GUS* in Wild-Type LRPs.

(A) GUS expression in a stage II LRP.

(B) The ring-like expression pattern of GUS in the LRP.

(C) GUS expression in the base of a LRP before emergence. Bars = 50  $\mu$ m.
