# Supplementary material
Source: PubMed Central journal article supplement (PMC1955702)
Supplement: plntcell_tpc.107.050674_3.pdf [file plntcell_tpc.107.050674_3.pdf]

### Supplemental Figure 3

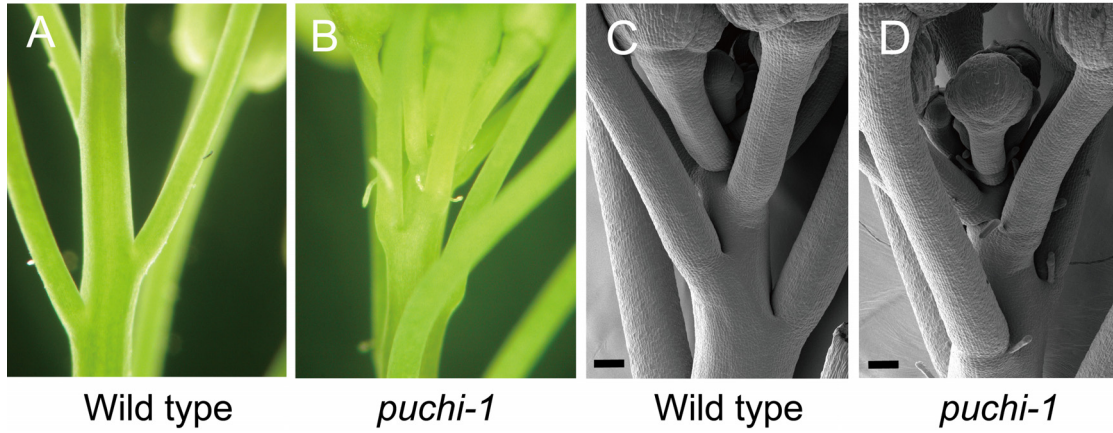

#### **Supplemental Figure 3. Flower Phenotypes of the *puchi* Mutant.**

(A) and (B) The inflorescence of wild-type (A) and *puchi-1* (B) plants.

(C) and (D) Scanning electron microscopic images of the inflorescence of wild-type (C) and *puchi-1* (D) plants. The *puchi-1* mutant forms a pair of small pin-shaped protrusions at the base of the pedicel. Bars = 100  $\mu$ m.
